# Supplementary material for: Procaine Abrogates the Epithelial-Mesenchymal Transition Process through Modulating c-Met Phosphorylation in Hepatocellular Carcinoma
Source: MDPI journal article supplement (doi:10.3390/cancers14204978), 2022-10-11

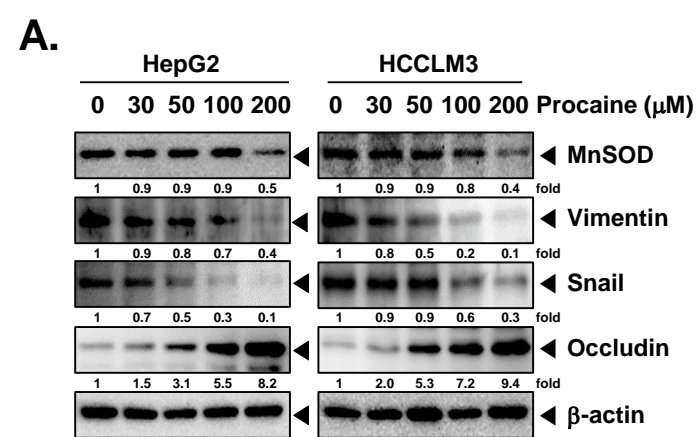

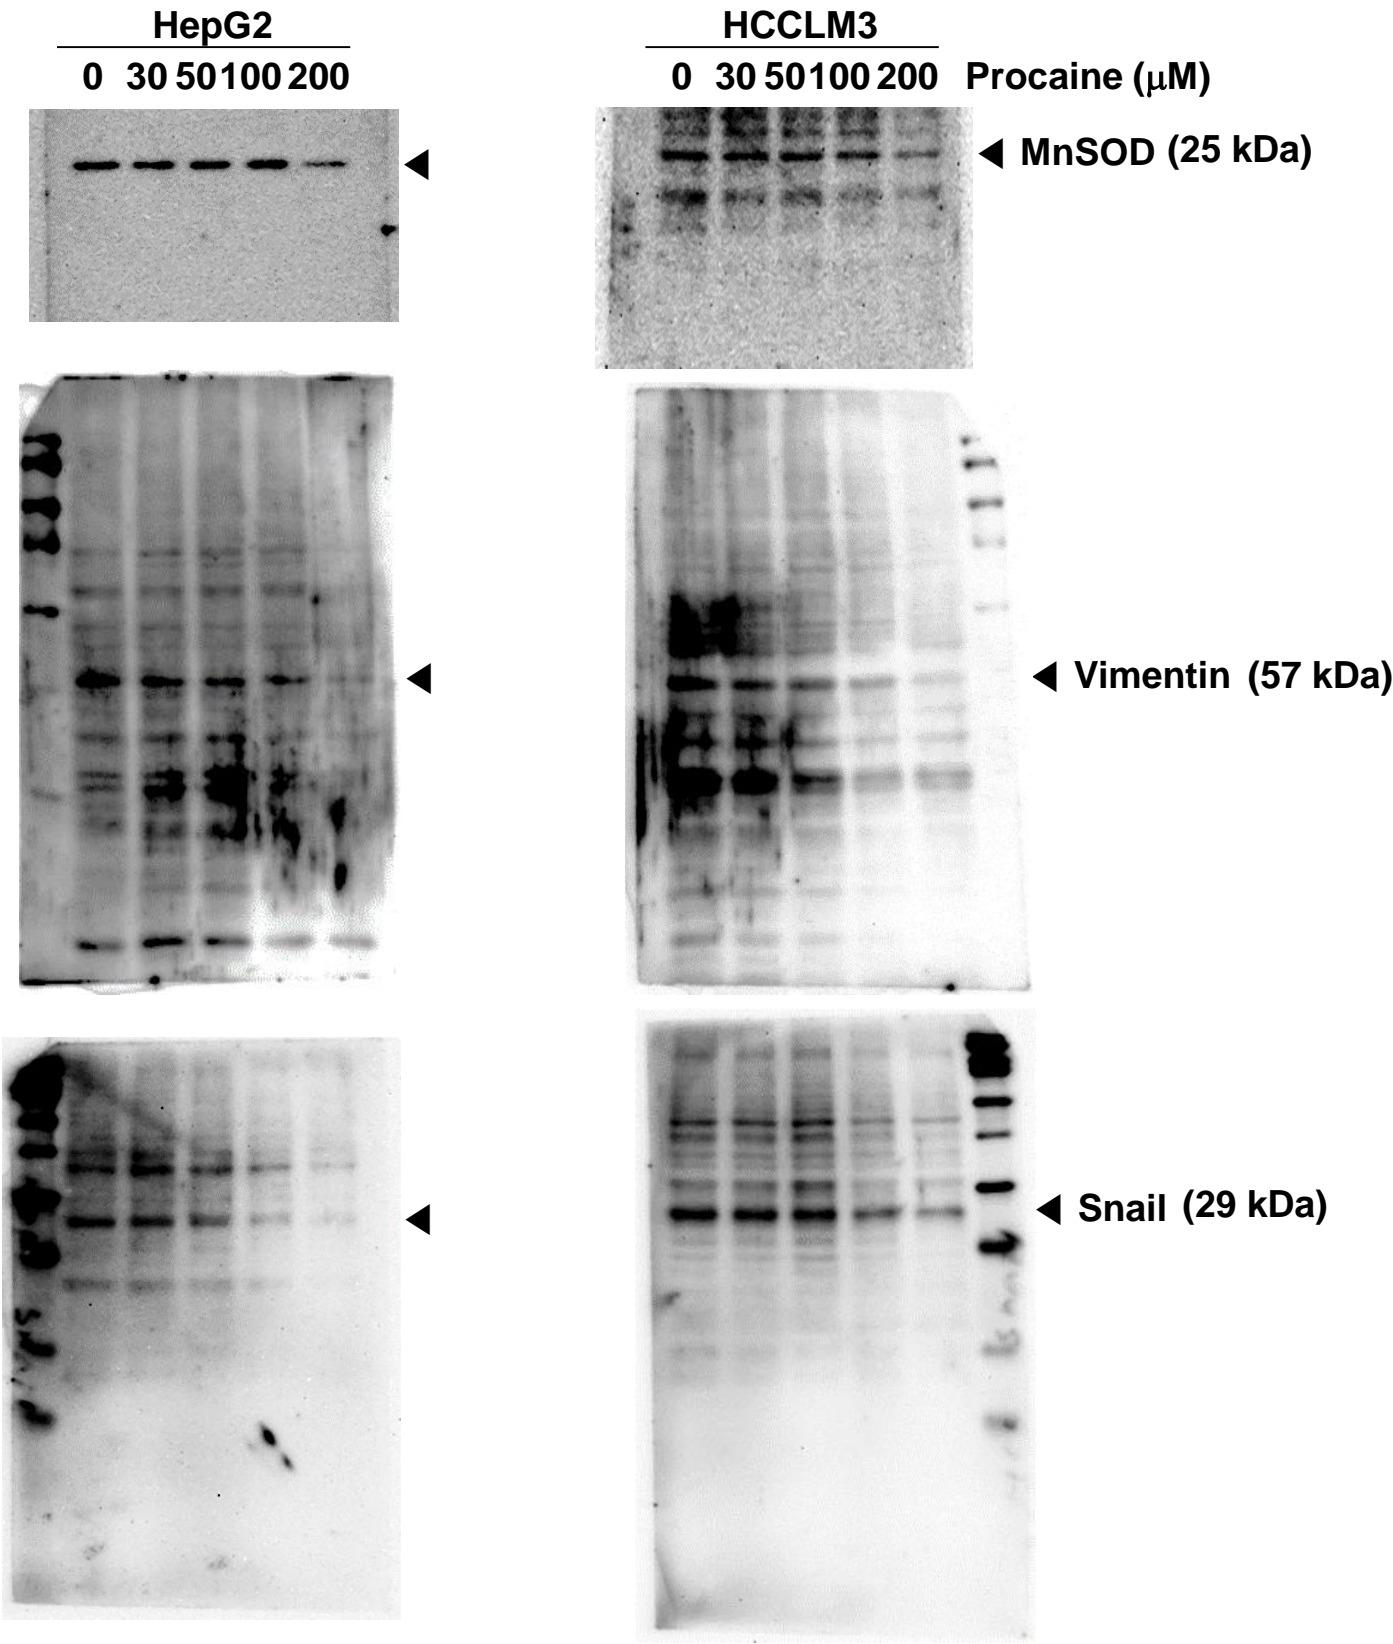

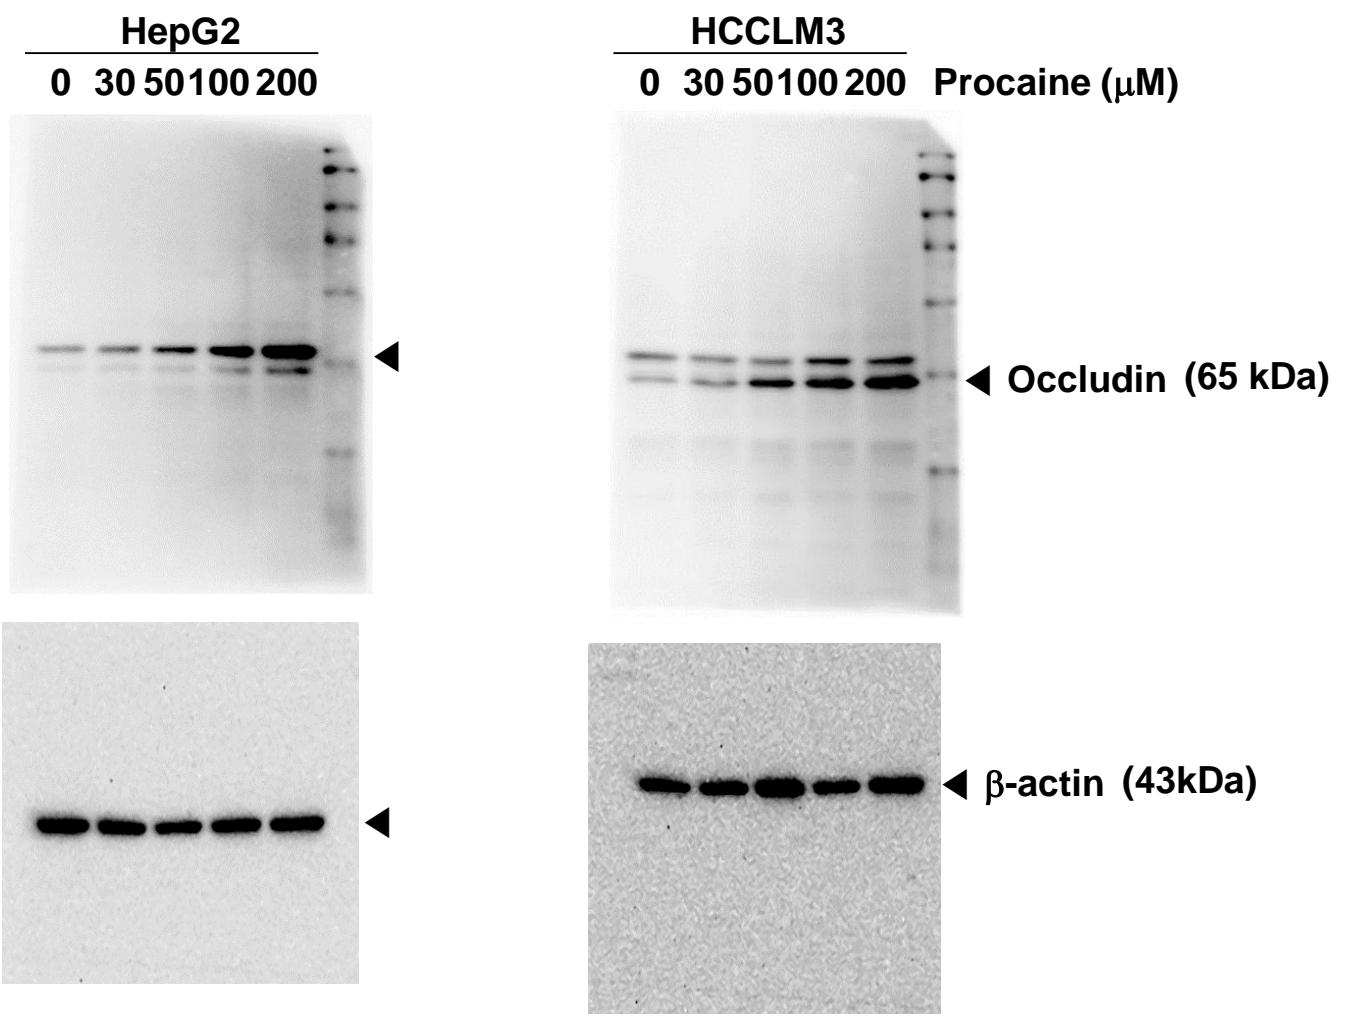

Fig.1C

HepG2

|   |   |   |   |
|---|---|---|---|
| - | - | + | + |
| - | + | - | + |

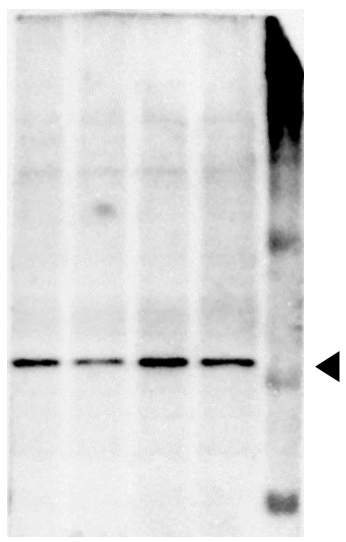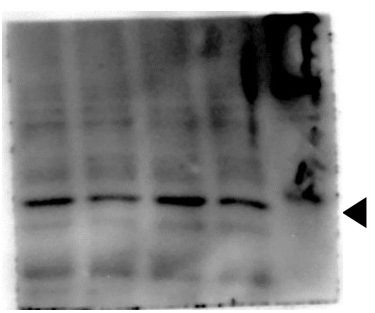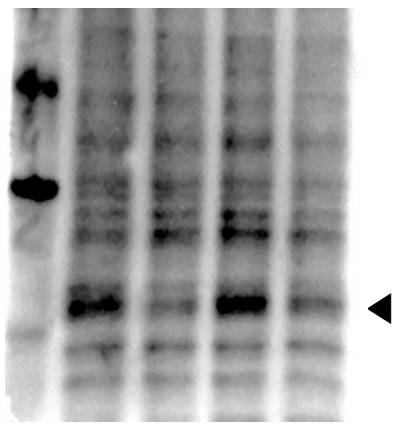

HCCLM3

|   |   |   |   |
|---|---|---|---|
| - | - | + | + |
| - | + | - | + |

HGF (50 ng/ml)  
Procaine (200  $\mu$ M)

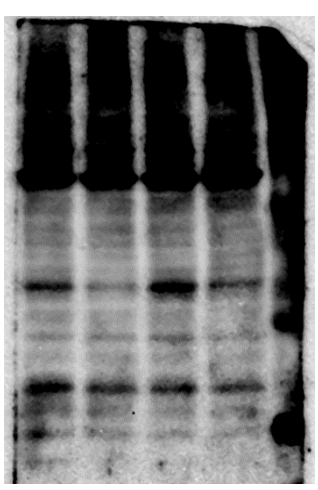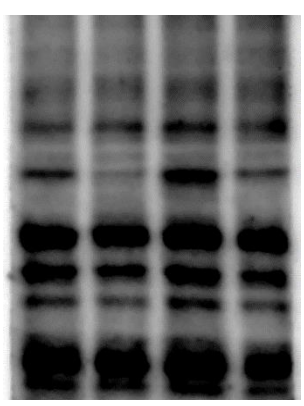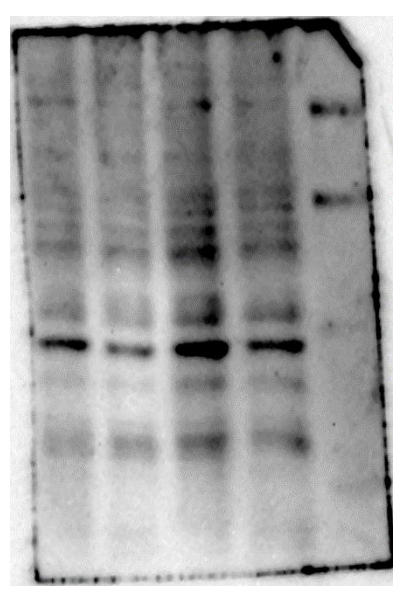

◀ MnSOD (25 kDa)

◀ Fibronectin (220 kDa)

◀ Vimentin (57 kDa)

Fig.1C

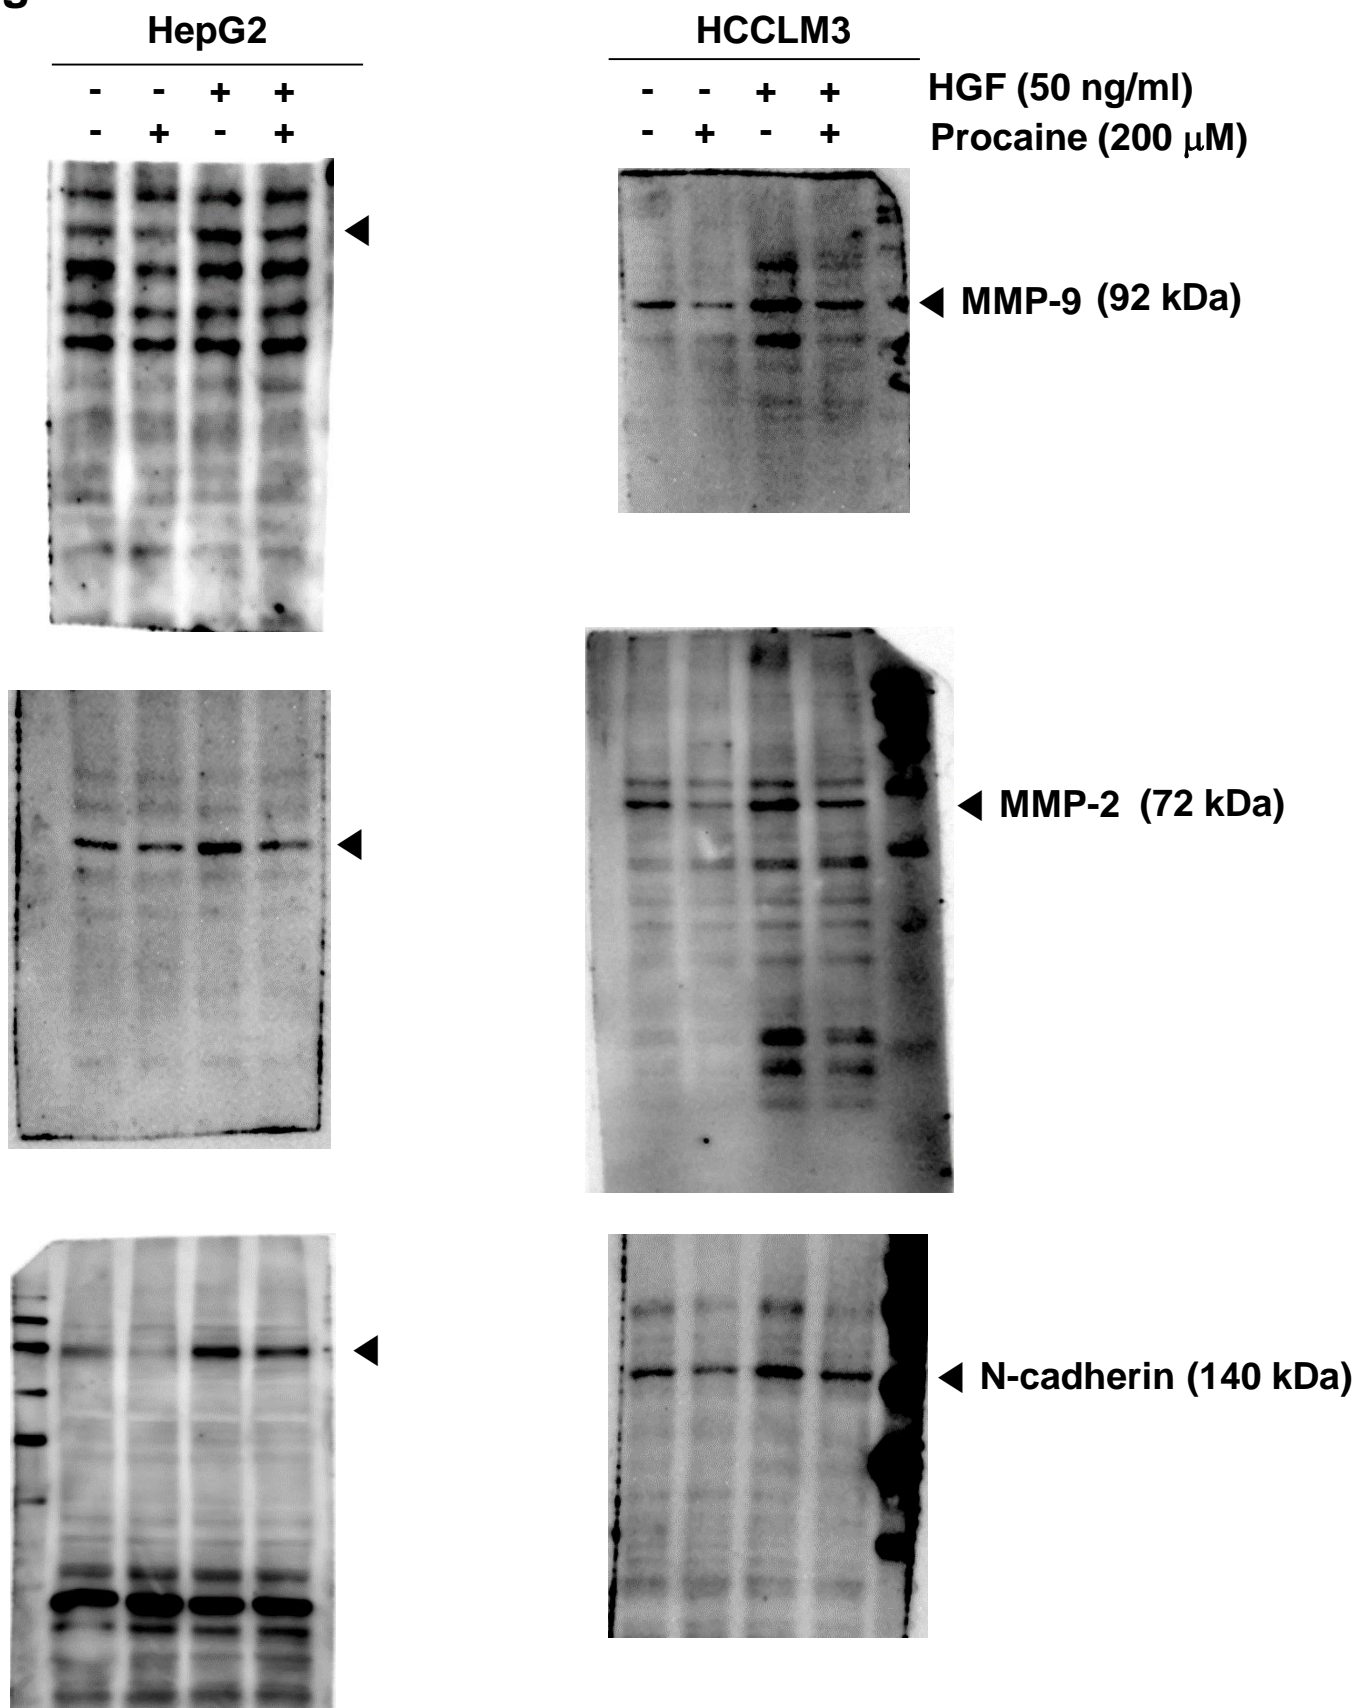



Fig.1C

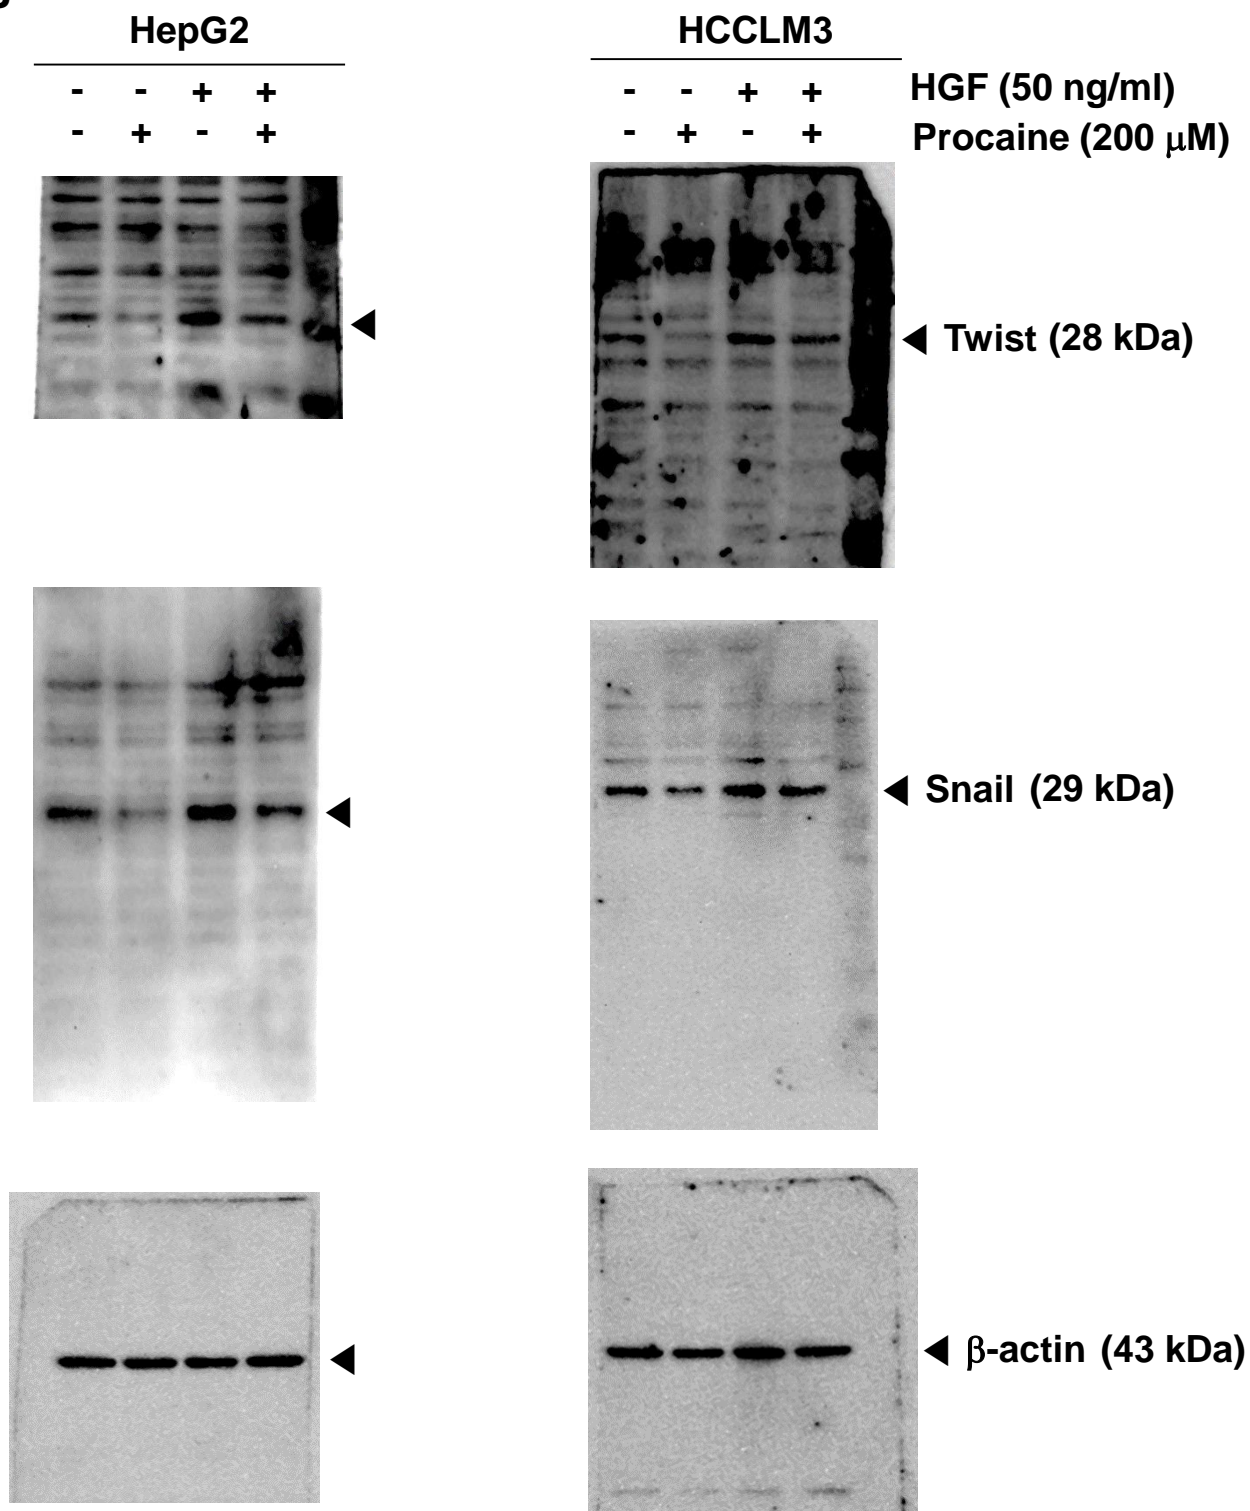

Fig.1D

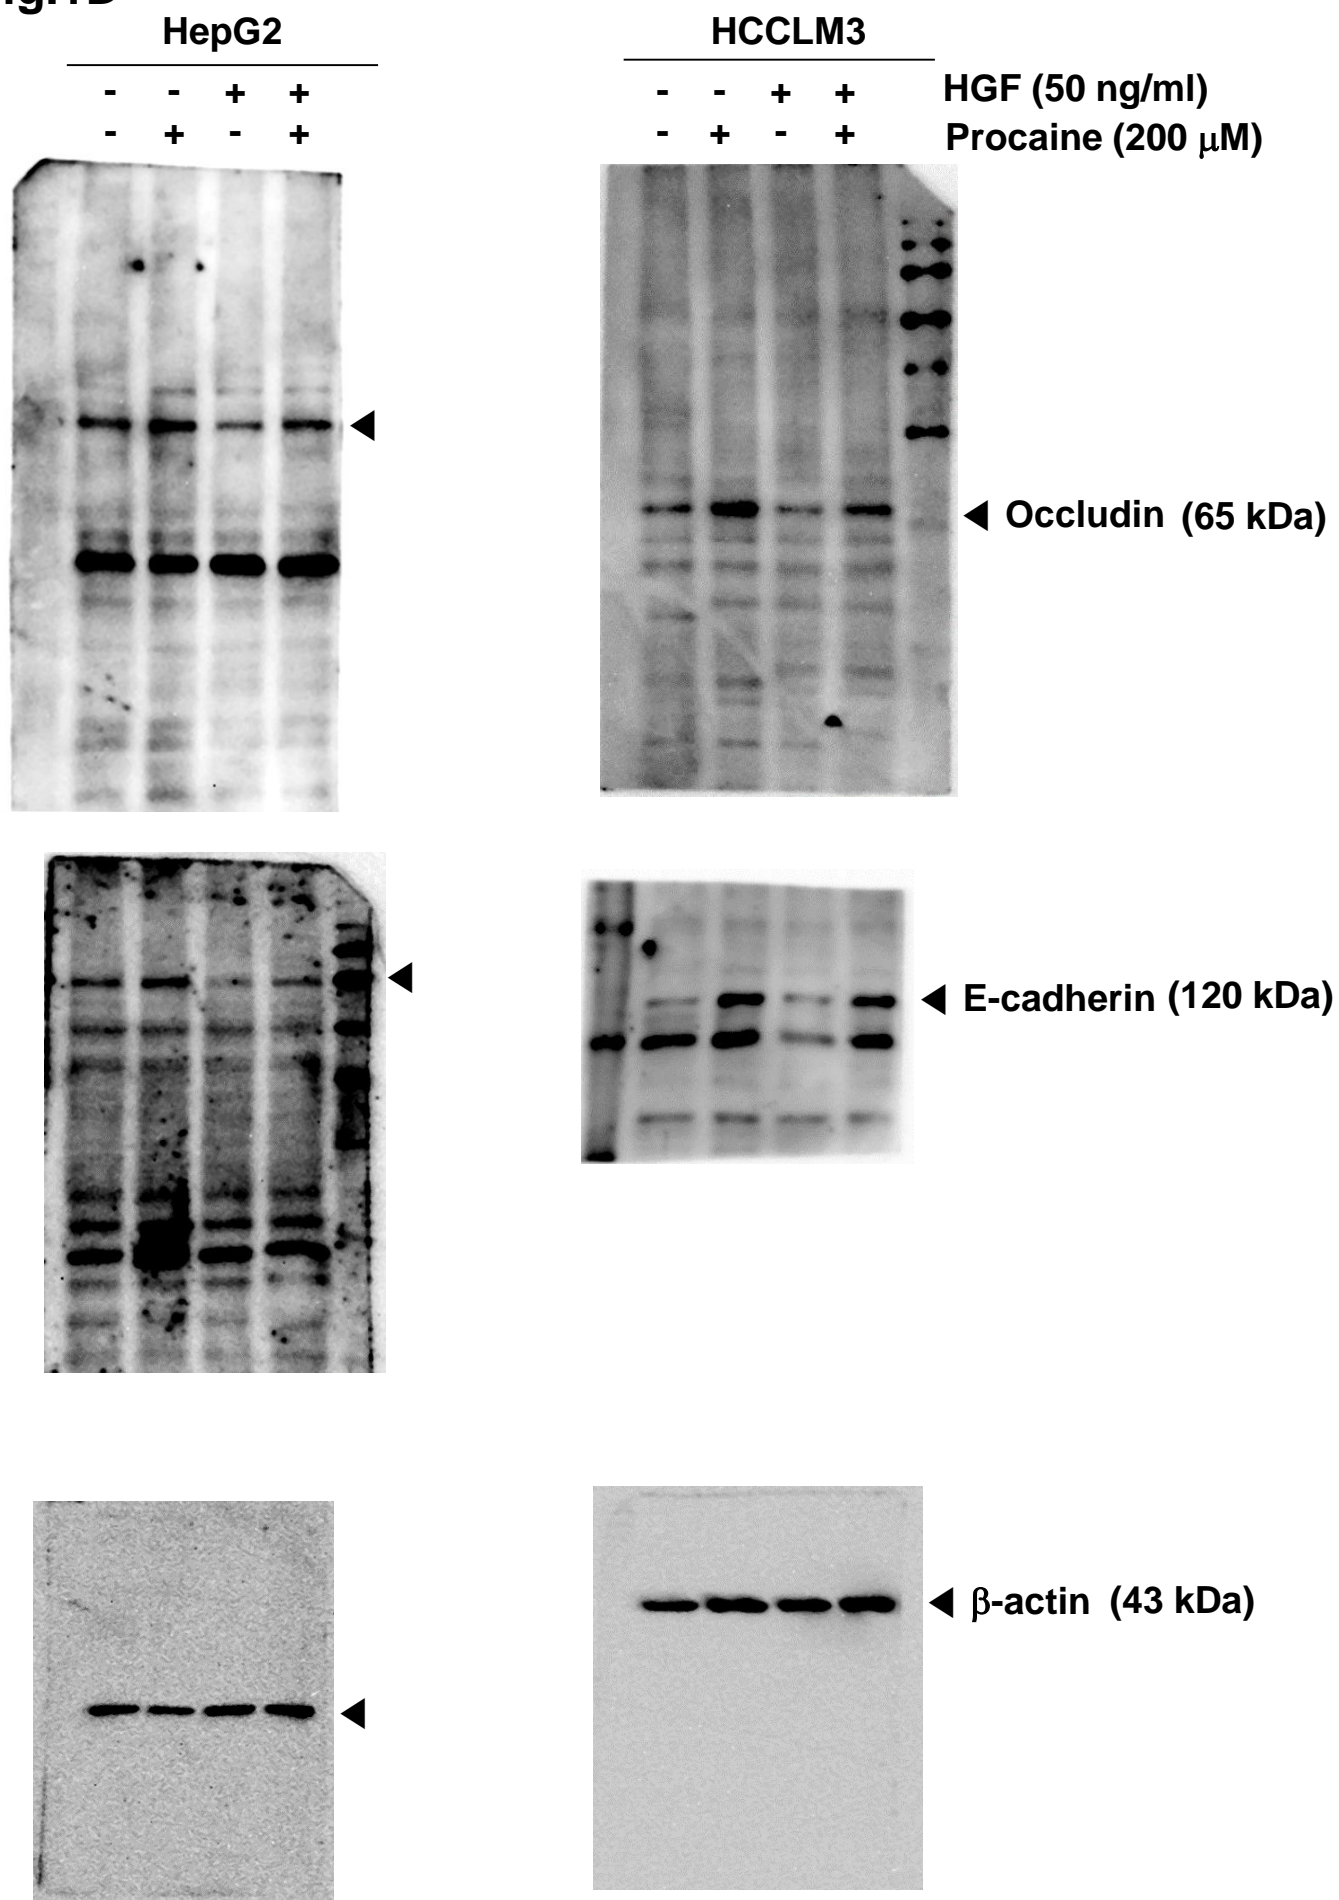

Fig.3A

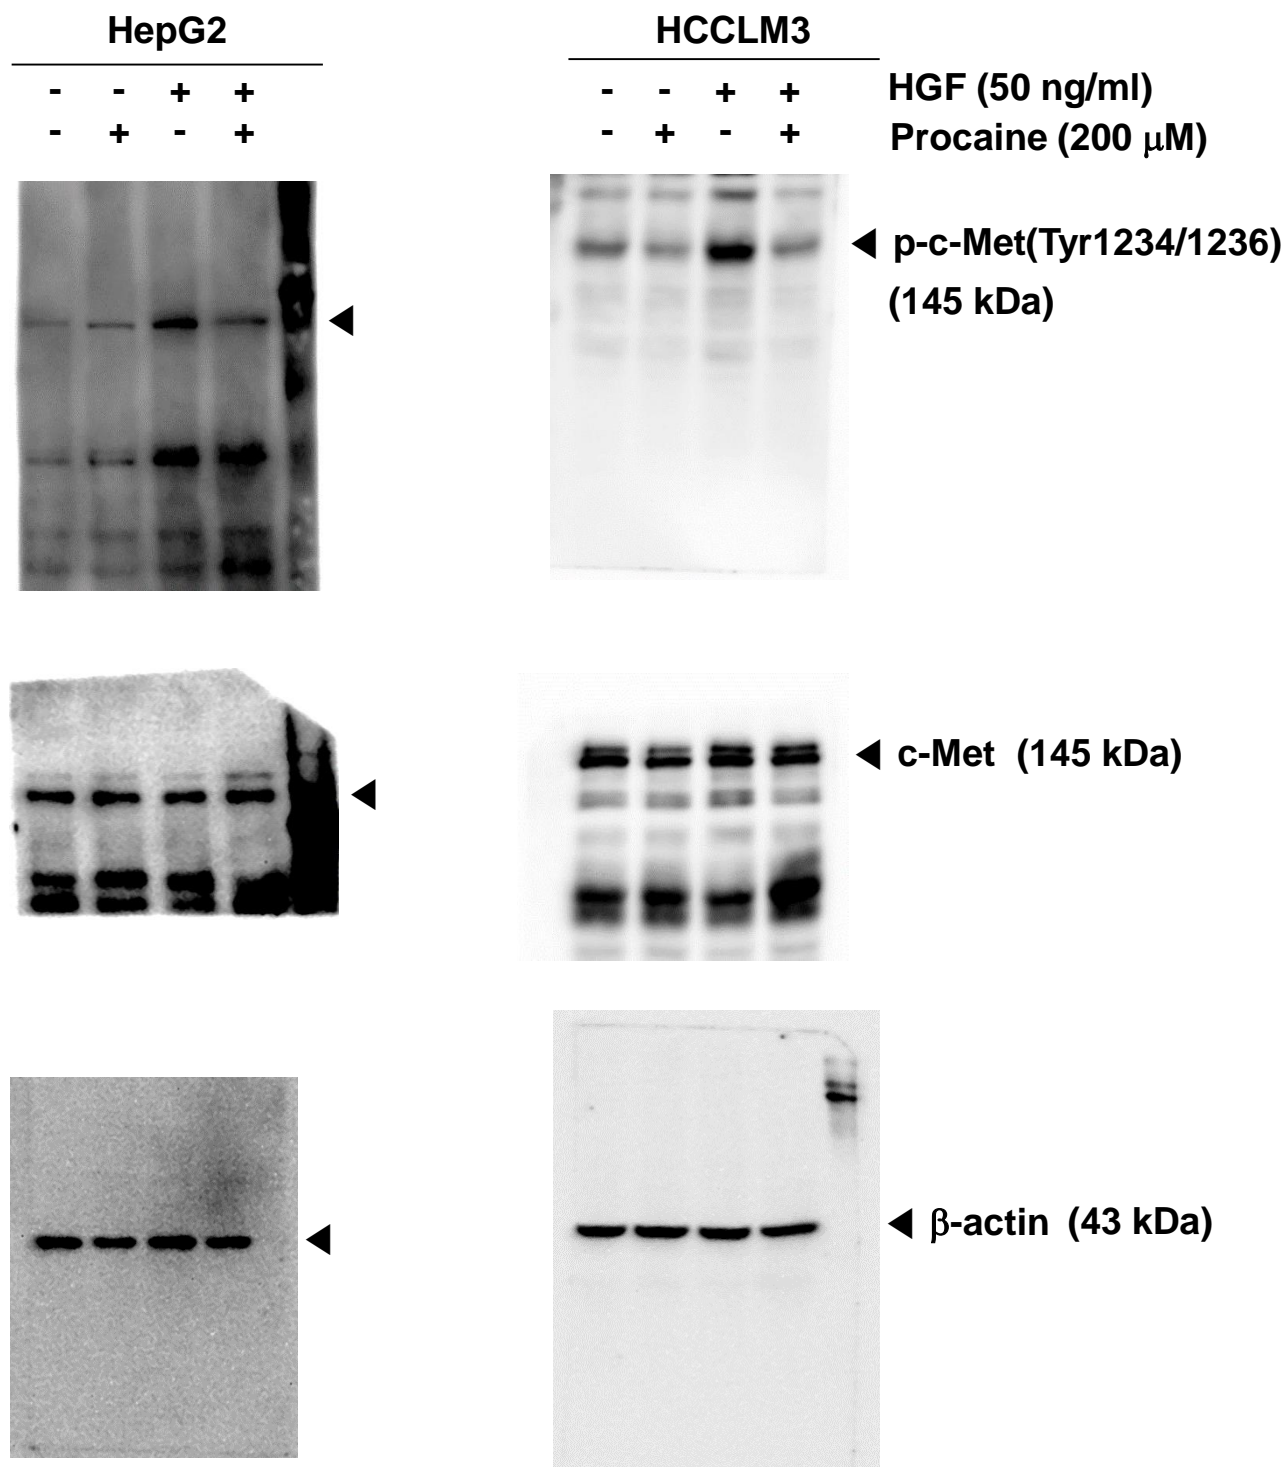



Fig.3B

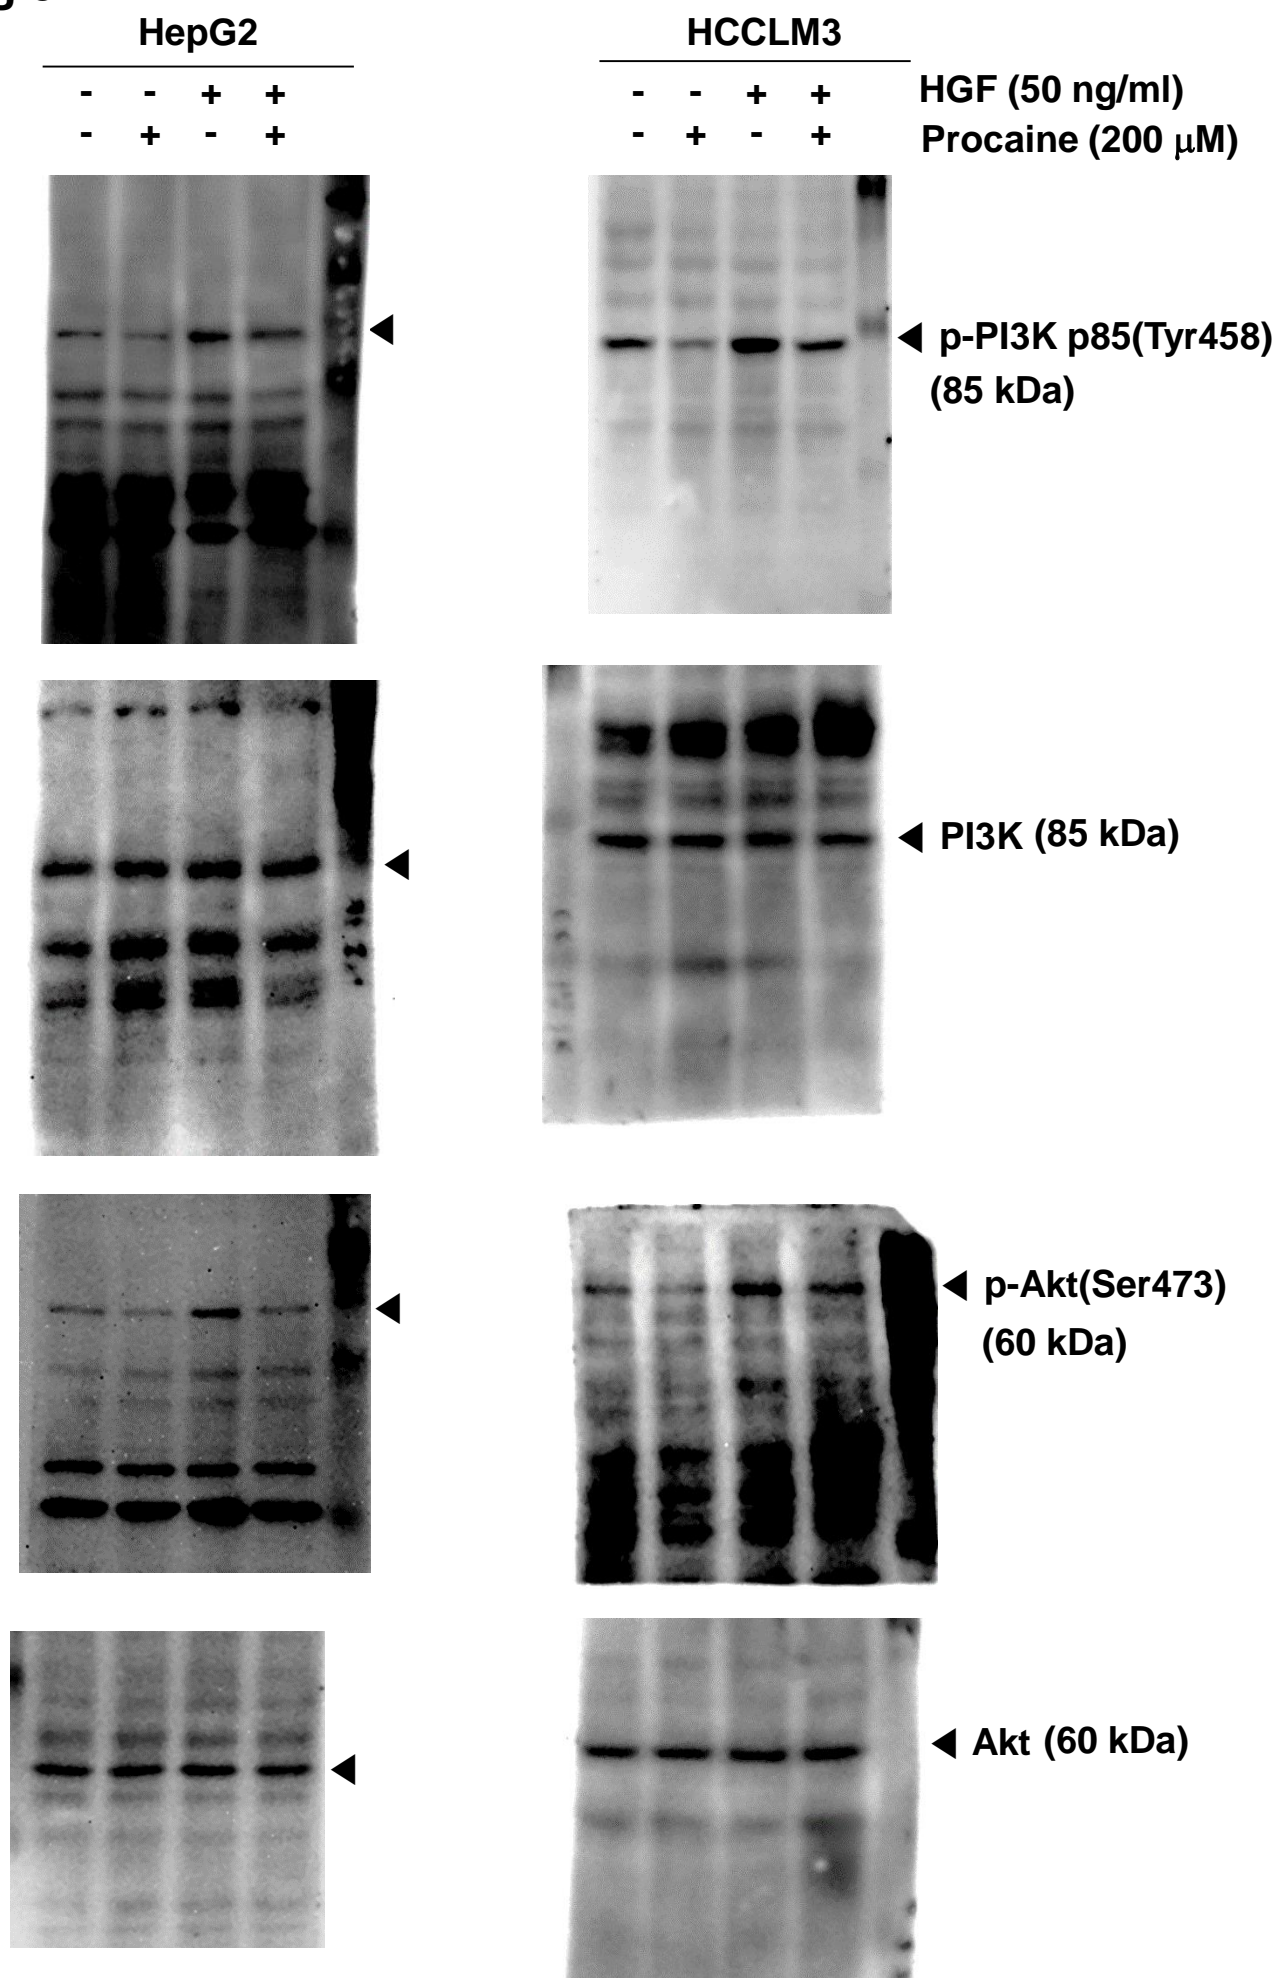

Fig.3B

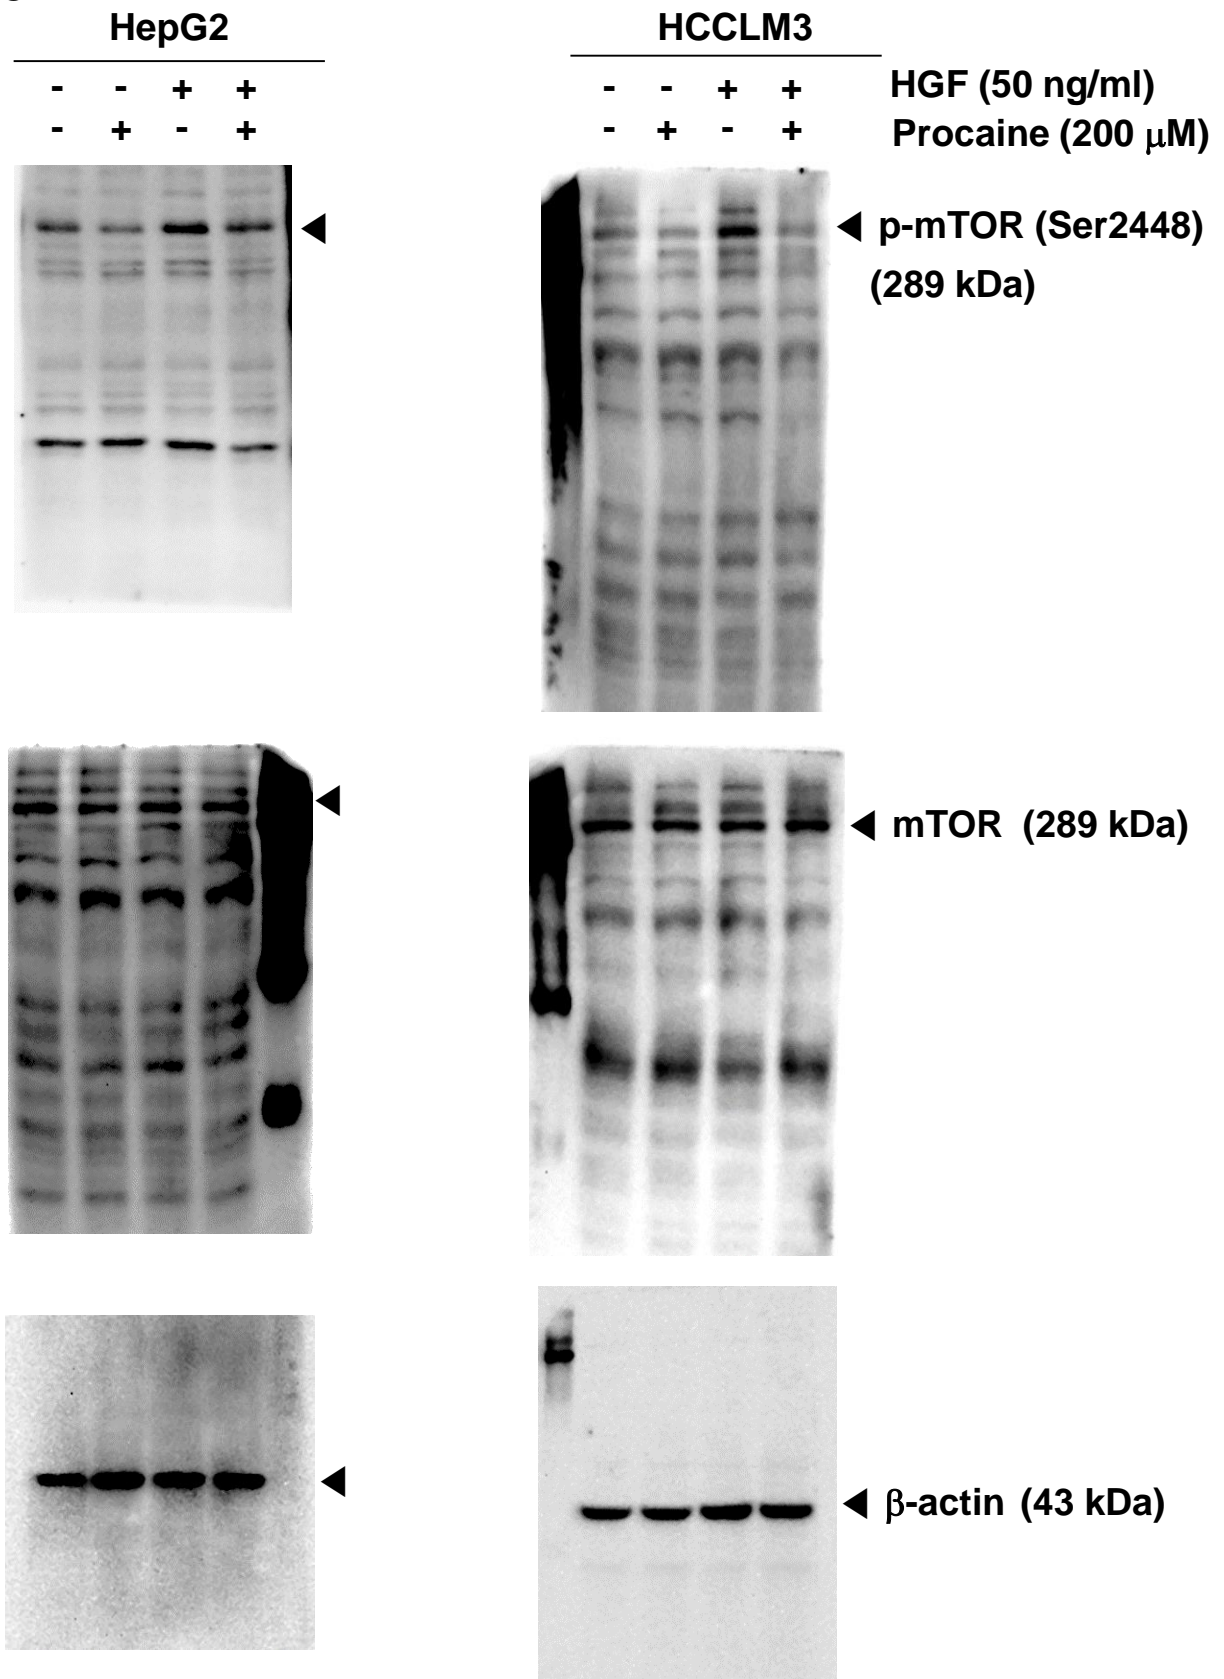

**Fig.3C****HepG2**

|   |   |   |   |
|---|---|---|---|
| - | - | + | + |
| - | + | - | + |

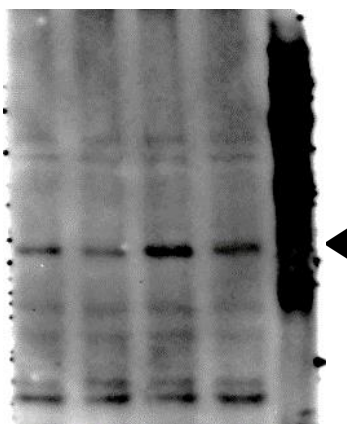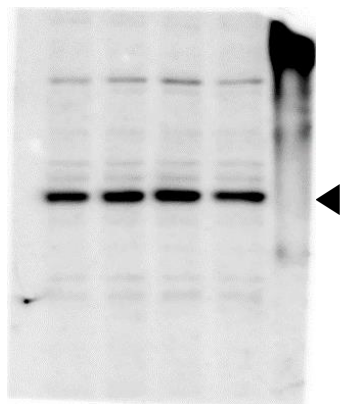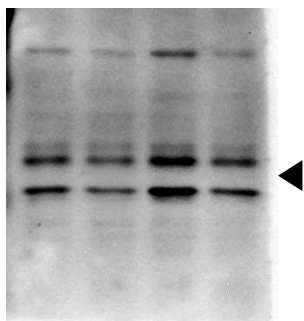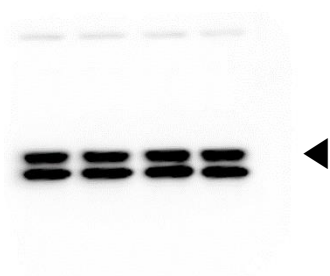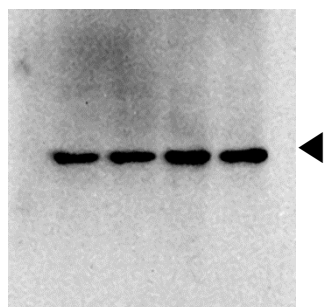**HCCLM3**

|   |   |   |   |
|---|---|---|---|
| - | - | + | + |
| - | + | - | + |

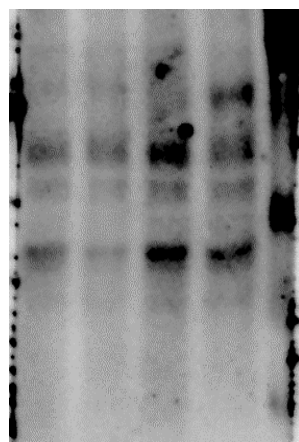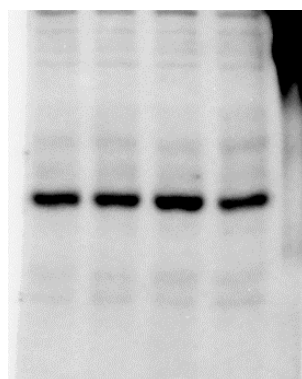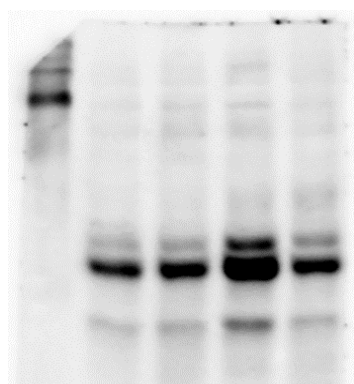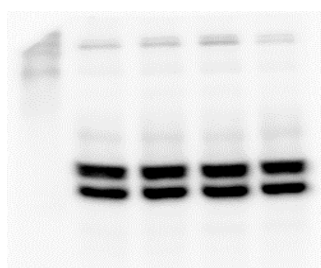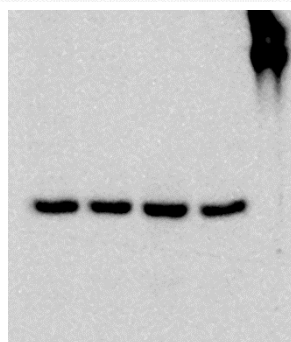**HGF (50 ng/ml)****Procaine (200  $\mu$ M)****◀ p-MEK(Ser217/221)  
(45 kDa)****◀ MEK (45 kDa)****◀ p-ERK(Thr202/Tyr204)  
(42, 44 kDa)****◀ ERK (42, 44 kDa)****◀  $\beta$ -actin (43kDa)****S11**



HepG2

|   |   |   |   |
|---|---|---|---|
| - | - | + | + |
| - | + | - | + |

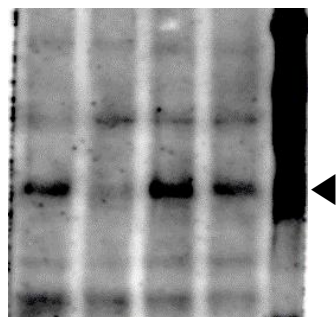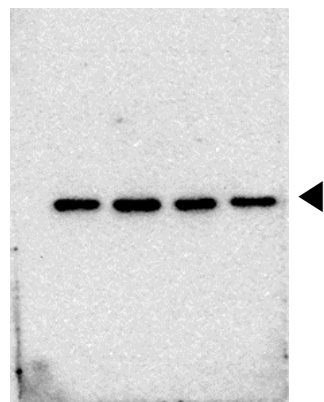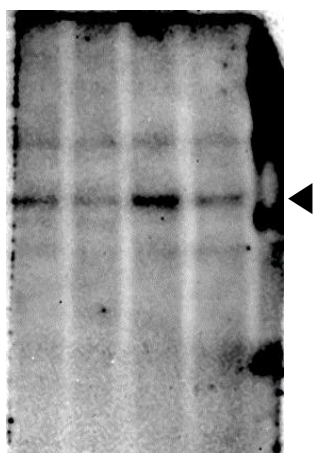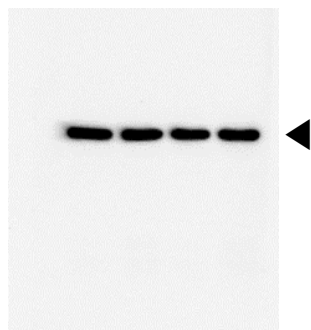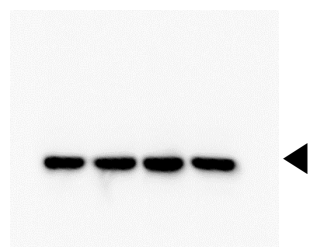

HCCLM3

|   |   |   |   |
|---|---|---|---|
| - | - | + | + |
| - | + | - | + |

HGF (50 ng/ml)

Procaine (200  $\mu$ M)

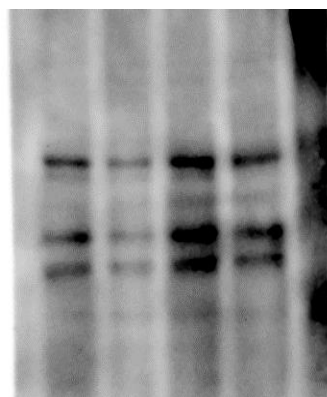

◀ p-JNK(Thr183/Tyr185)  
(48 kDa)

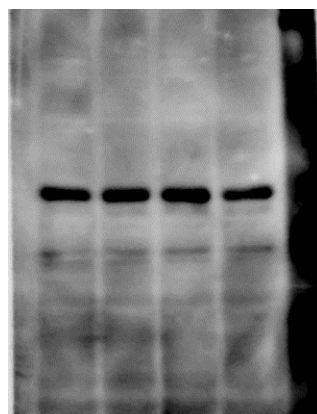

◀ JNK (48 kDa)

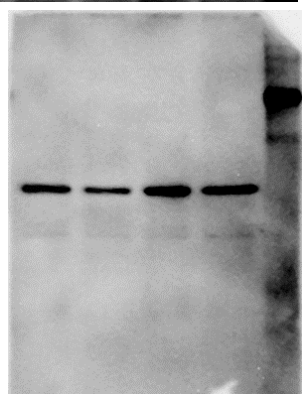

◀ p-p38(Thr180/Tyr182)  
(38 kDa)

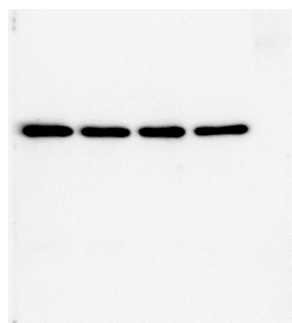

◀ p38 (38 kDa)

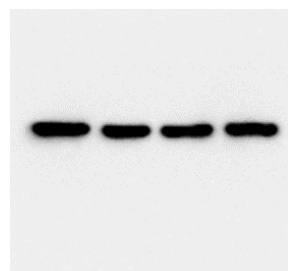

◀  $\beta$ -actin (43 kDa)

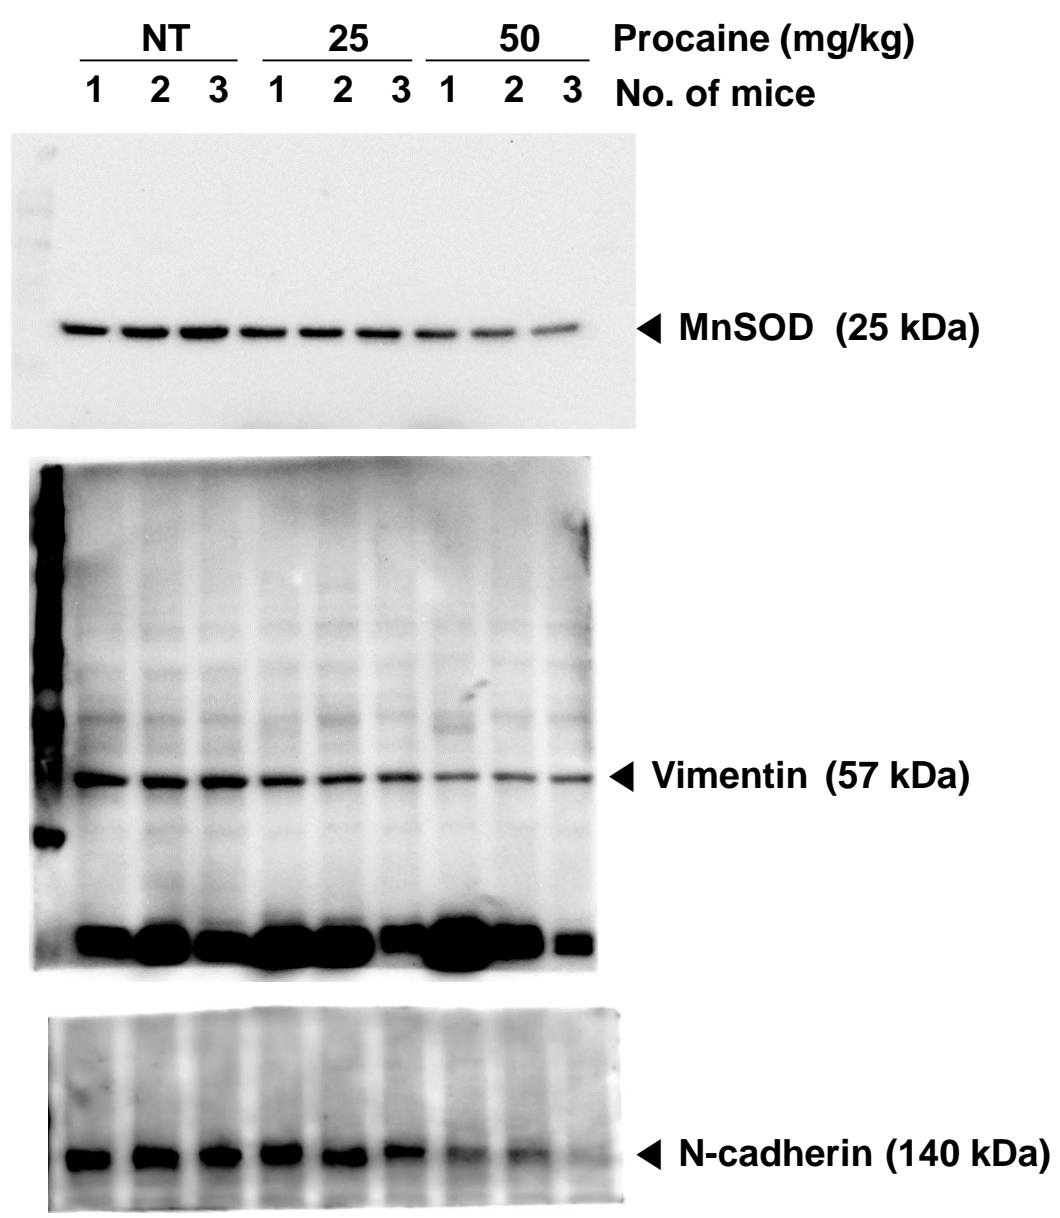



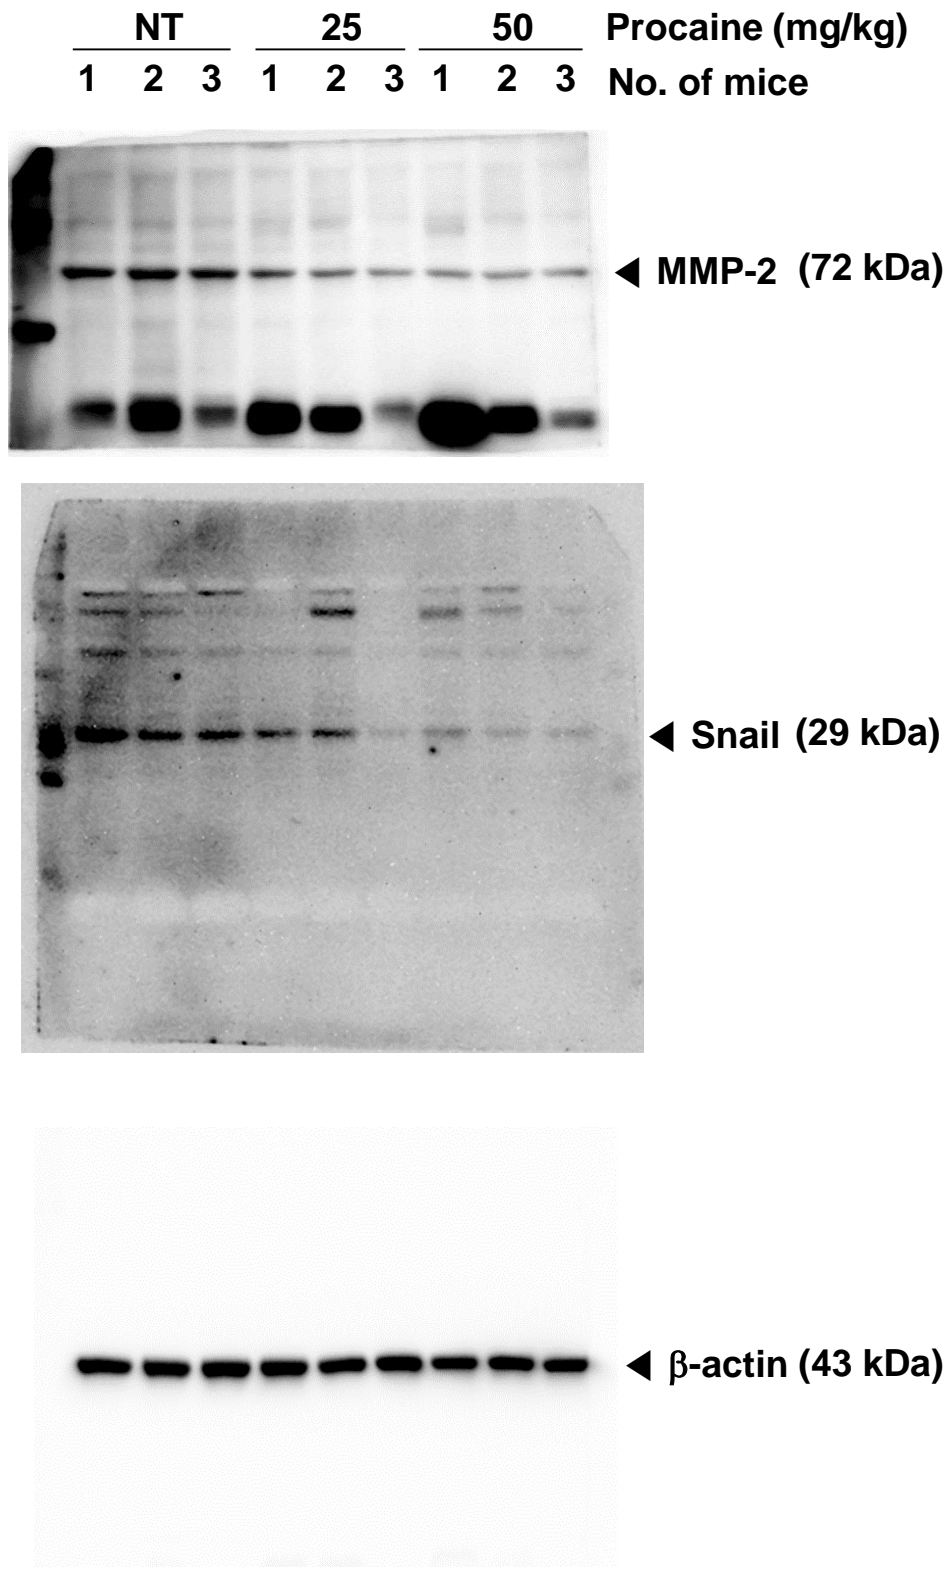

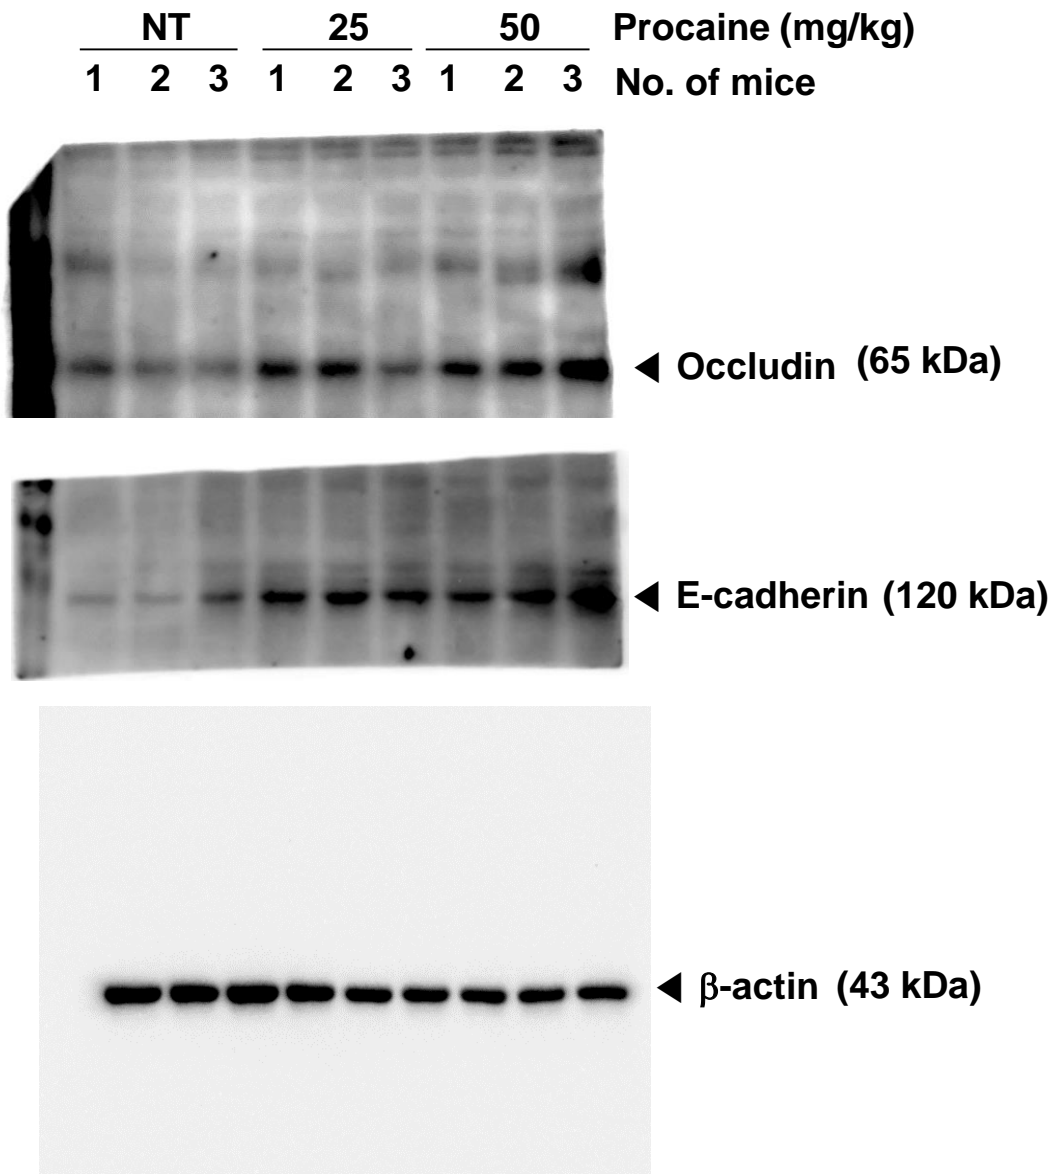

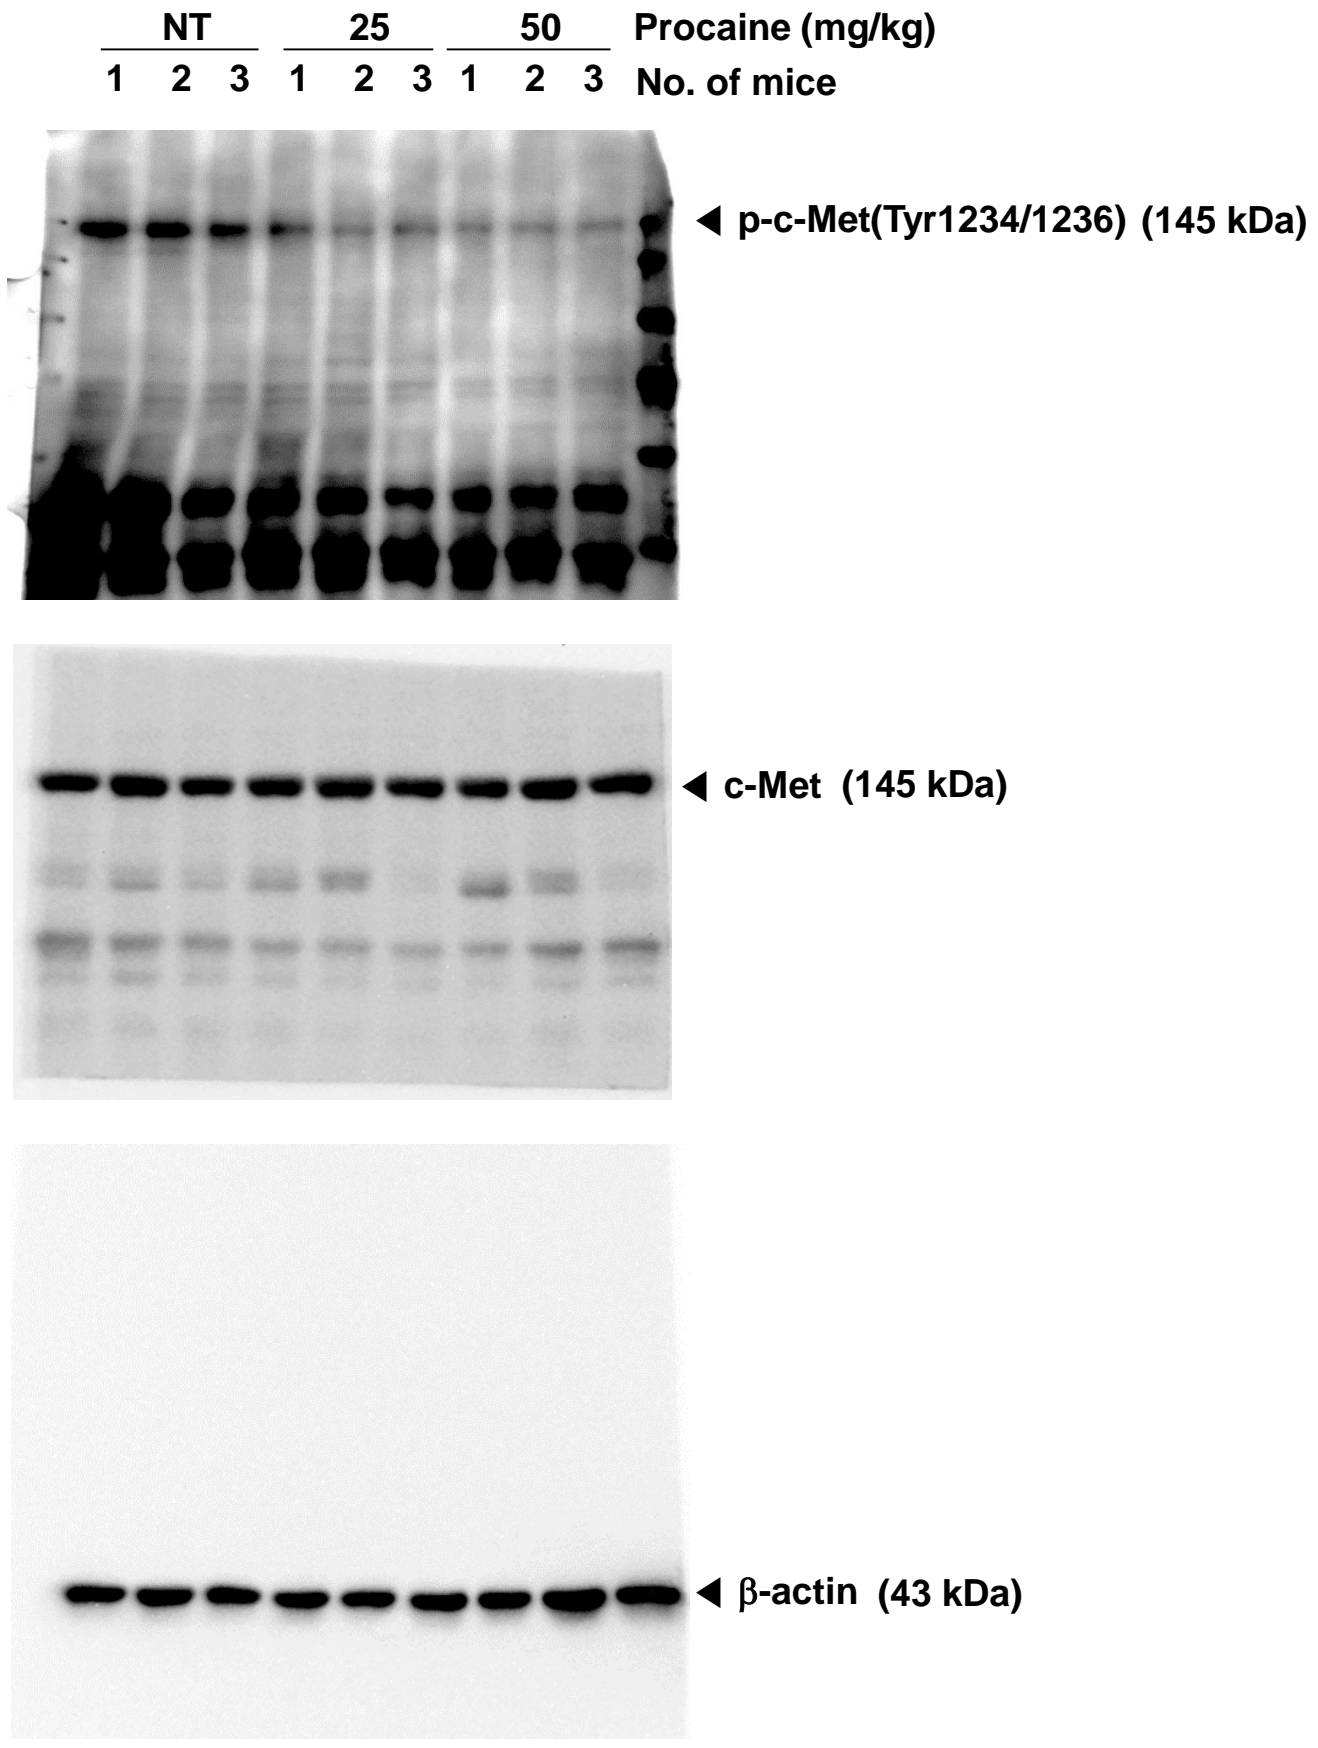

**Fig.5D**

| NT |   |   | 25 |   |   | 50 |   |   | Procaine (mg/kg) |
|----|---|---|----|---|---|----|---|---|------------------|
| 1  | 2 | 3 | 1  | 2 | 3 | 1  | 2 | 3 | No. of mice      |

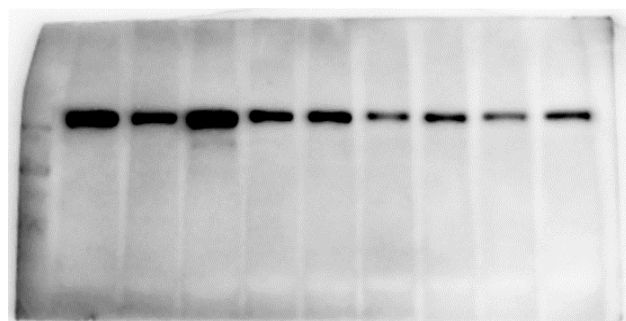

◀ p-PI3K p85(Tyr458) (85 kDa)

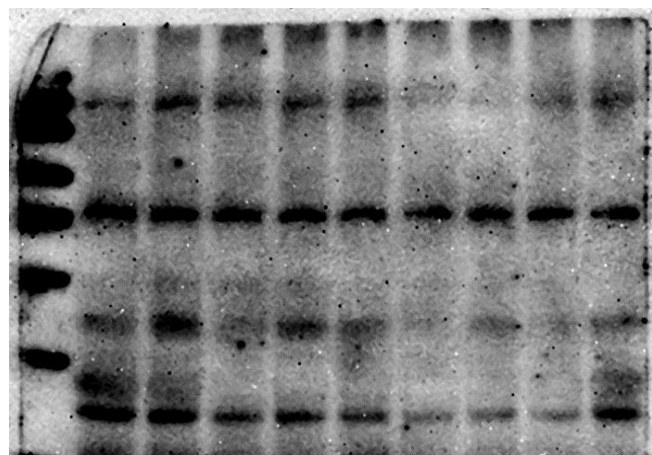

◀ PI3K (85 kDa)

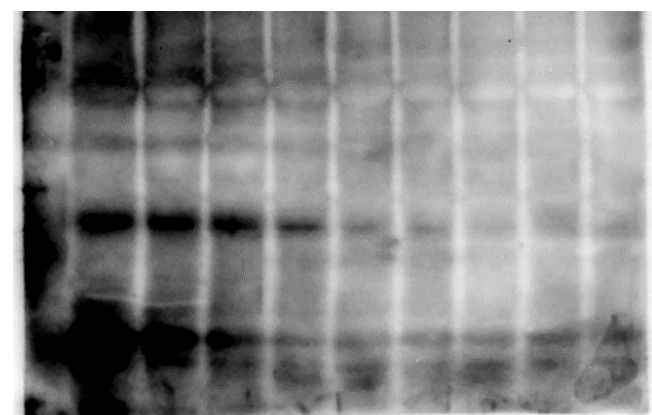

◀ p-Akt(Ser473) (60 kDa)

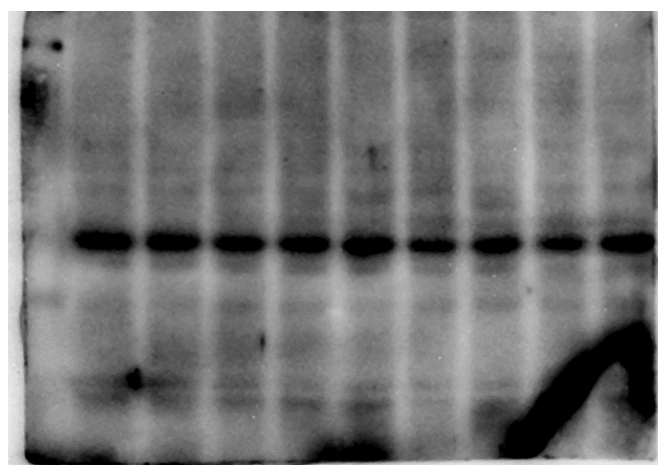

◀ Akt (60 kDa)

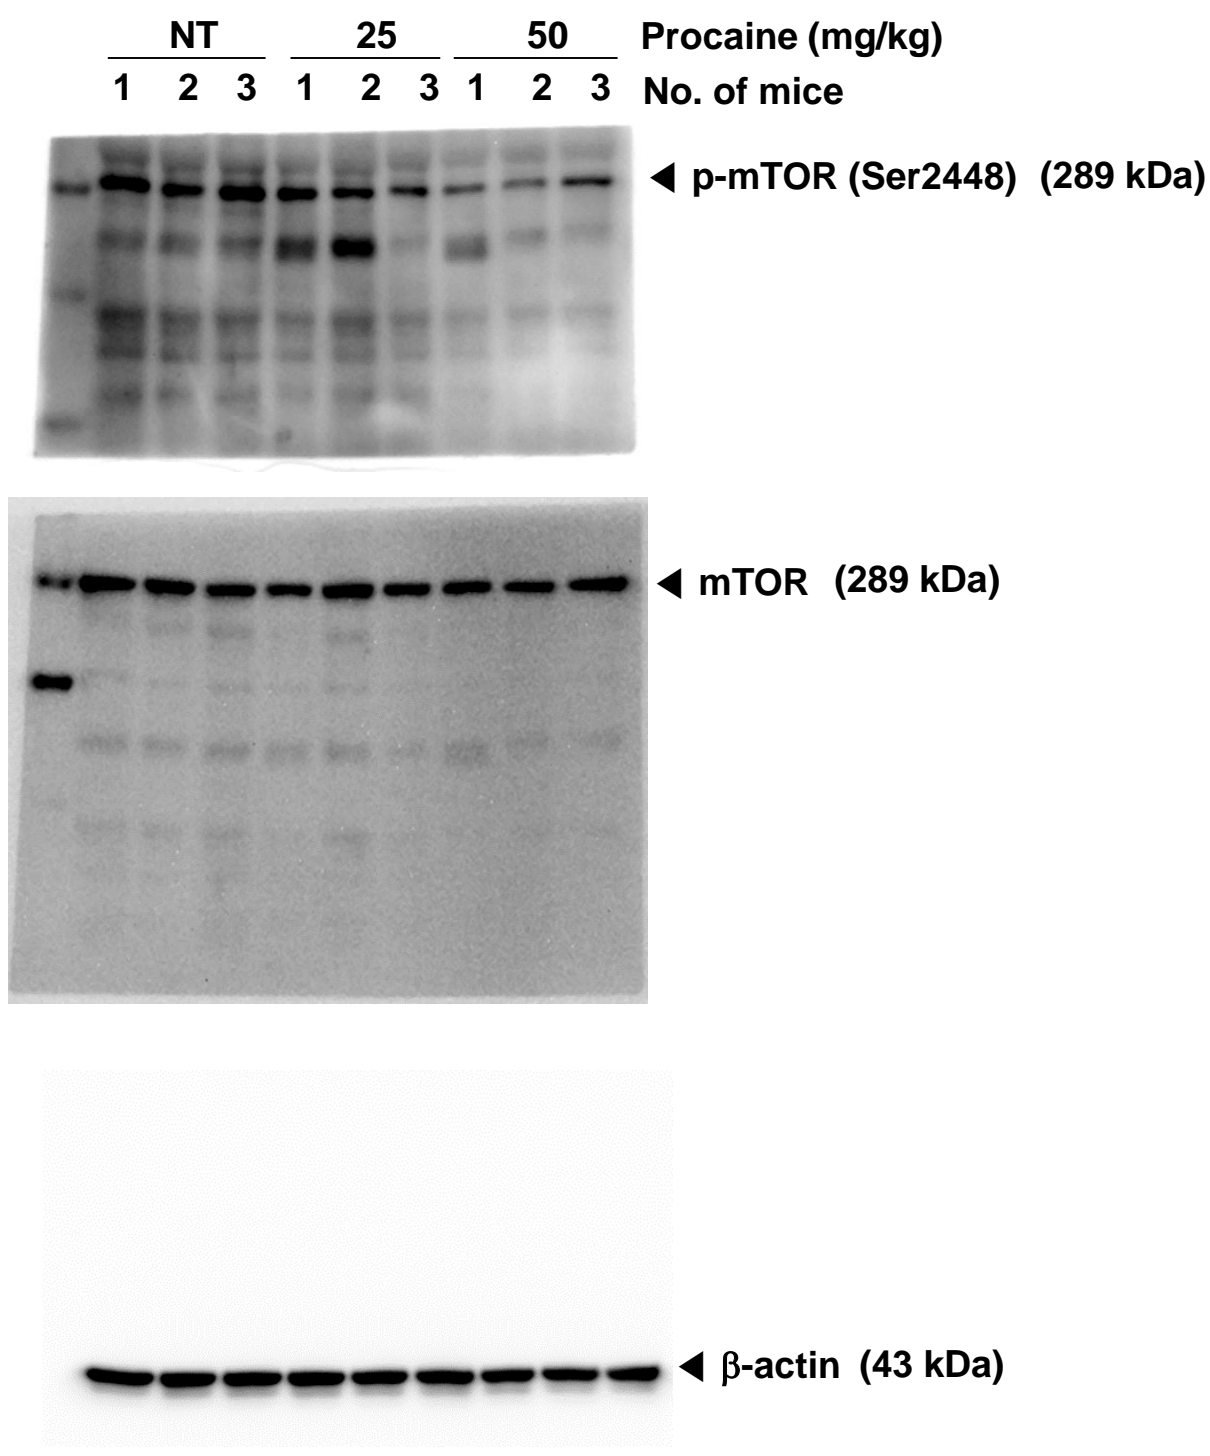



**Fig.5D****S19**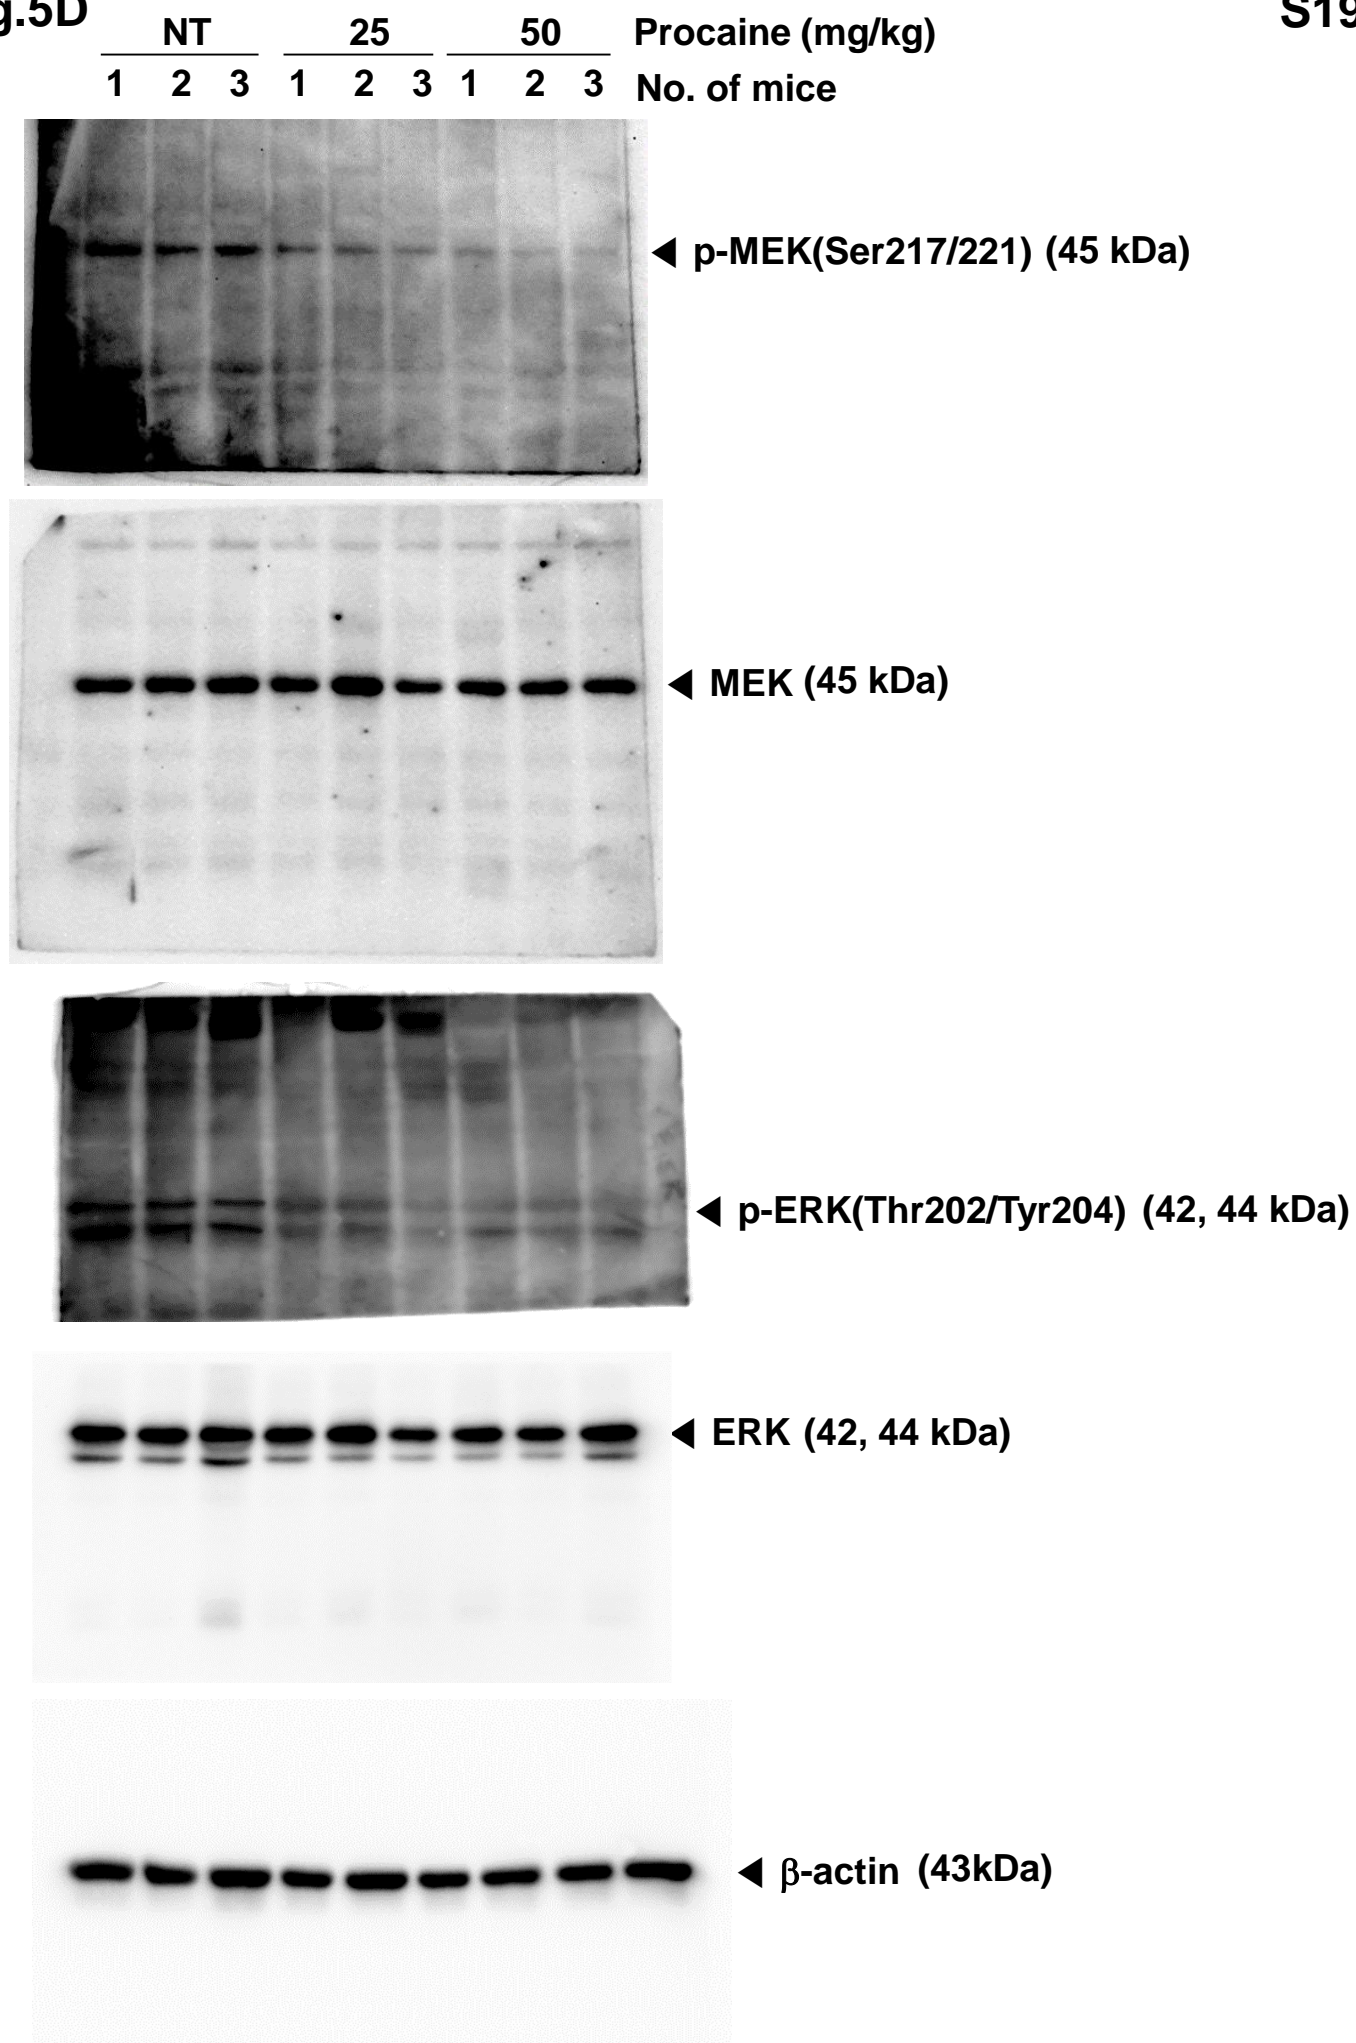

Supplement: s1 [file s1]
